# Supplementary material for: Physical activity and creativity of children and youths
Source: Springer Nature journal article supplement (doi:10.1186/s12887-020-2017-2), 2020-03-12
Supplement: MOESM2 [file 17793562]

| gender | age | CQ | PA1 | PA2 | PA3 |
|--------|-----|----|-----|-----|-----|
| female | 6   | 20 | 1   | 3   | 7   |
| male   | 6   | 18 | 7   | 7   | 0   |
| female | 6   | 18 | 2   | 3   | 0   |
| male   | 6   | 15 | 2   | 1   | 6   |
| male   | 6   | 18 | 3   | 0   | 0   |
| female | 6   | 24 | 2   | 3   | 2   |
| female | 7   | 18 | 5   | 3   | 0   |
| male   | 7   | 18 | 6   | 5   | 6   |
| male   | 7   | 18 | 7   | 4   | 4   |
| male   | 7   | 15 | 7   | 6   | 2   |
| female | 7   | 19 | 5   | 3   | 0   |
| female | 7   | 17 | 5   | 3   | 0   |

|        |   |    |   |   |   |
|--------|---|----|---|---|---|
| male   | 8 | 21 | 7 | 7 | 0 |
| male   | 8 | 18 | 7 | 7 | 0 |
| male   | 8 | 18 | 2 | 1 | 0 |
| female | 8 | 27 | 0 | 2 | 3 |
| female | 8 | 28 | 4 | 7 | 1 |
| female | 8 | 19 | 1 | 1 | 1 |
| male   | 9 | 19 | 4 | 2 | 4 |
| male   | 9 | 22 | 5 | 2 | 4 |
| male   | 9 | 23 | 5 | 2 | 3 |
| female | 9 | 21 | 7 | 1 | 2 |
| female | 9 | 18 | 7 | 2 | 2 |
| female | 9 | 16 | 7 | 1 | 1 |
| female | 7 | 34 | 7 | 5 | 0 |
| female | 7 | 18 | 7 | 3 | 0 |
| female | 7 | 17 | 6 | 7 | 7 |

|        |   |    |   |   |   |
|--------|---|----|---|---|---|
| female | 7 | 20 | 2 | 5 | 0 |
| female | 7 | 18 | 6 | 5 | 0 |
| male   | 7 | 19 | 7 | 4 | 2 |
| male   | 7 | 19 | 3 | 3 | 0 |
| male   | 7 | 16 | 4 | 5 | 5 |
| male   | 7 | 20 | 2 | 5 | 2 |
| female | 9 | 21 | 3 | 0 | 7 |
| female | 9 | 14 | 0 | 0 | 5 |
| female | 9 | 19 | 0 | 0 | 4 |
| male   | 9 | 17 | 0 | 5 | 7 |
| male   | 9 | 15 | 7 | 5 | 7 |
| male   | 9 | 16 | 7 | 0 | 7 |
| female | 9 | 23 | 7 | 0 | 3 |
| female | 9 | 17 | 1 | 0 | 7 |
| female | 9 | 20 | 7 | 6 | 7 |

|        |   |    |   |   |   |
|--------|---|----|---|---|---|
| male   | 9 | 17 | 0 | 0 | 3 |
| male   | 6 | 15 | 1 | 1 | 2 |
| female | 6 | 17 | 7 | 0 | 5 |
| female | 6 | 15 | 1 | 0 | 7 |
| male   | 6 | 16 | 7 | 2 | 5 |
| female | 7 | 16 | 2 | 0 | 7 |
| male   | 7 | 14 | 2 | 0 | 7 |
| female | 8 | 26 | 3 | 0 | 7 |
| female | 8 | 20 | 4 | 0 | 7 |
| male   | 8 | 26 | 4 | 2 | 6 |
| male   | 8 | 24 | 4 | 3 | 5 |
| female | 9 | 24 | 7 | 7 | 0 |
| female | 9 | 18 | 7 | 7 | 3 |
| male   | 9 | 17 | 0 | 0 | 1 |
| male   | 9 | 21 | 5 | 5 | 3 |

|        |   |    |   |   |   |
|--------|---|----|---|---|---|
| female | 8 | 16 | 4 | 1 | 4 |
| female | 8 | 19 | 2 | 0 | 7 |
| male   | 8 | 22 | 4 | 1 | 1 |
| female | 8 | 17 | 1 | 0 | 2 |
| female | 8 | 16 | 1 | 0 | 0 |
| female | 8 | 21 | 1 | 0 | 2 |
| male   | 8 | 22 | 1 | 0 | 1 |
| male   | 9 | 17 | 1 | 0 | 0 |
| female | 9 | 20 | 2 | 0 | 1 |
| female | 9 | 17 | 2 | 0 | 7 |
| female | 9 | 17 | 2 | 0 | 7 |
| female | 9 | 12 | 1 | 0 | 7 |
| female | 9 | 20 | 2 | 0 | 7 |
| male   | 9 | 22 | 4 | 0 | 1 |
| male   | 9 | 23 | 4 | 0 | 1 |

|        |   |    |   |   |   |
|--------|---|----|---|---|---|
| male   | 9 | 16 | 0 | 1 | 0 |
| male   | 9 | 15 | 5 | 3 | 1 |
| female | 7 | 21 | 2 | 3 | 4 |
| male   | 7 | 16 | 4 | 2 | 1 |
| female | 7 | 24 | 3 | 1 | 5 |
| female | 8 | 24 | 3 | 1 | 4 |
| male   | 8 | 23 | 1 | 2 | 4 |
| female | 8 | 20 | 1 | 0 | 0 |
| male   | 8 | 14 | 1 | 0 | 1 |
| male   | 6 | 16 | 1 | 1 | 0 |
| female | 6 | 18 | 1 | 0 | 0 |
| male   | 6 | 22 | 3 | 1 | 0 |
| male   | 6 | 21 | 3 | 2 | 0 |
| female | 6 | 23 | 1 | 1 | 0 |
| female | 6 | 14 | 0 | 0 | 0 |

|        |   |    |   |   |   |
|--------|---|----|---|---|---|
| female | 6 | 16 | 2 | 3 | 2 |
| male   | 6 | 14 | 4 | 5 | 7 |
| female | 6 | 17 | 3 | 6 | 4 |
| female | 6 | 15 | 2 | 3 | 2 |
| male   | 6 | 15 | 3 | 7 | 4 |
| female | 7 | 20 | 9 | 9 | 9 |
| male   | 7 | 17 | 5 | 2 | 6 |
| male   | 7 | 18 | 5 | 5 | 6 |
| female | 7 | 19 | 2 | 0 | 5 |
| male   | 8 | 29 | 1 | 1 | 1 |
| female | 8 | 20 | 0 | 1 | 1 |
| female | 8 | 15 | 2 | 2 | 3 |
| male   | 8 | 16 | 2 | 2 | 3 |
| male   | 8 | 20 | 1 | 2 | 1 |
| male   | 8 | 21 | 2 | 1 | 3 |

|        |   |    |   |   |   |
|--------|---|----|---|---|---|
| male   | 8 | 17 | 2 | 3 | 5 |
| male   | 8 | 19 | 2 | 2 | 0 |
| female | 9 | 19 | 2 | 1 | 0 |
| female | 9 | 19 | 2 | 1 | 0 |
| male   | 9 | 20 | 6 | 2 | 1 |
| male   | 9 | 26 | 2 | 1 | 0 |
| male   | 9 | 24 | 0 | 2 | 0 |
| female | 9 | 23 | 3 | 1 | 1 |
| female | 6 | 15 | 7 | 7 | 6 |
| male   | 6 | 21 | 4 | 2 | 0 |
| female | 7 | 18 | 4 | 2 | 4 |
| female | 7 | 16 | 7 | 7 | 7 |
| female | 7 | 14 | 0 | 0 | 0 |
| female | 7 | 10 | 0 | 0 | 0 |
| female | 8 | 17 | 6 | 2 | 7 |



|        |   |    |   |   |   |
|--------|---|----|---|---|---|
| female | 8 | 16 | 1 | 1 | 5 |
| female | 8 | 16 | 5 | 5 | 2 |
| male   | 8 | 18 | 4 | 2 | 0 |
| male   | 8 | 20 | 7 | 7 | 0 |
| male   | 8 | 26 | 7 | 7 | 0 |
| male   | 9 | 26 | 7 | 7 | 7 |
| female | 9 | 19 | 6 | 6 | 7 |
| female | 9 | 18 | 7 | 7 | 5 |
| female | 9 | 16 | 0 | 0 | 1 |
| male   | 9 | 19 | 0 | 0 | 2 |
| male   | 9 | 19 | 7 | 1 | 7 |
| male   | 9 | 23 | 7 | 1 | 7 |
| male   | 7 | 15 | 3 | 2 | 4 |
| male   | 7 | 25 | 2 | 2 | 0 |
| female | 7 | 25 | 1 | 5 | 7 |

|        |   |    |   |   |   |
|--------|---|----|---|---|---|
| male   | 8 | 19 | 6 | 4 | 4 |
| female | 8 | 19 | 5 | 0 | 0 |
| male   | 8 | 17 | 5 | 0 | 7 |
| male   | 8 | 17 | 5 | 5 | 7 |
| female | 8 | 19 | 0 | 0 | 3 |
| female | 8 | 25 | 7 | 2 | 0 |
| female | 9 | 15 | 0 | 0 | 5 |
| female | 9 | 21 | 7 | 2 | 7 |
| male   | 9 | 12 | 7 | 0 | 7 |
| male   | 9 | 19 | 7 | 7 | 2 |
| female | 9 | 17 | 0 | 0 | 5 |
| male   | 9 | 10 | 7 | 2 | 0 |
| male   | 6 | 23 | 3 | 0 | 0 |
| male   | 7 | 17 | 3 | 4 | 0 |
| male   | 7 | 22 | 2 | 3 | 0 |

|        |   |    |   |   |   |
|--------|---|----|---|---|---|
| male   | 7 | 16 | 7 | 7 | 0 |
| male   | 7 | 21 | 0 | 0 | 7 |
| female | 7 | 15 | 2 | 0 | 2 |
| female | 7 | 16 | 3 | 1 | 2 |
| female | 7 | 22 | 2 | 2 | 2 |
| male   | 7 | 23 | 2 | 2 | 2 |
| male   | 7 | 14 | 4 | 0 | 2 |
| female | 7 | 10 | 5 | 0 | 7 |
| female | 8 | 20 | 0 | 0 | 1 |
| male   | 8 | 15 | 5 | 5 | 5 |
| male   | 8 | 16 | 5 | 7 | 5 |
| male   | 8 | 21 | 7 | 7 | 2 |
| female | 9 | 14 | 1 | 0 | 3 |
| female | 9 | 16 | 1 | 0 | 4 |
| female | 9 | 21 | 0 | 0 | 7 |

|        |   |    |   |   |   |
|--------|---|----|---|---|---|
| male   | 9 | 17 | 4 | 3 | 7 |
| female | 9 | 21 | 0 | 0 | 7 |
| male   | 9 | 20 | 4 | 2 | 5 |
| female | 9 | 18 | 0 | 0 | 2 |
| female | 9 | 21 | 5 | 5 | 0 |
| male   | 9 | 29 | 5 | 5 | 5 |
| female | 9 | 21 | 4 | 4 | 0 |
| male   | 9 | 30 | 7 | 5 | 3 |
| female | 6 | 15 | 1 | 2 | 7 |
| female | 7 | 19 | 0 | 3 | 7 |
| female | 7 | 21 | 0 | 4 | 1 |
| male   | 7 | 21 | 2 | 0 | 2 |
| female | 7 | 16 | 4 | 3 | 7 |
| male   | 7 | 18 | 3 | 0 | 0 |
| female | 8 | 22 | 7 | 7 | 7 |

|        |   |    |   |   |   |
|--------|---|----|---|---|---|
| female | 8 | 21 | 7 | 7 | 7 |
| male   | 8 | 23 | 0 | 2 | 0 |
| male   | 8 | 18 | 2 | 2 | 0 |
| male   | 8 | 21 | 1 | 4 | 4 |
| male   | 8 | 20 | 2 | 3 | 0 |
| female | 8 | 27 | 3 | 5 | 1 |
| male   | 8 | 20 | 5 | 2 | 0 |
| female | 9 | 23 | 4 | 3 | 2 |
| female | 9 | 18 | 1 | 5 | 7 |
| female | 9 | 18 | 1 | 5 | 7 |
| female | 9 | 18 | 1 | 5 | 7 |
| male   | 9 | 24 | 7 | 3 | 1 |
| male   | 9 | 23 | 5 | 1 | 2 |
| male   | 9 | 21 | 5 | 1 | 1 |
| female | 6 | 16 | 3 | 1 | 1 |

|        |   |    |   |   |   |
|--------|---|----|---|---|---|
| male   | 6 | 19 | 7 | 2 | 7 |
| male   | 6 | 24 | 7 | 2 | 7 |
| female | 6 | 15 | 2 | 0 | 2 |
| male   | 7 | 24 | 7 | 0 | 7 |
| female | 7 | 17 | 4 | 2 | 7 |
| female | 7 | 18 | 4 | 2 | 7 |
| female | 7 | 16 | 1 | 0 | 1 |
| female | 7 | 15 | 1 | 0 | 1 |
| female | 7 | 16 | 1 | 1 | 1 |
| male   | 7 | 19 | 2 | 2 | 2 |
| female | 7 | 23 | 1 | 0 | 0 |
| male   | 7 | 14 | 2 | 2 | 0 |
| female | 7 | 16 | 3 | 6 | 5 |
| female | 7 | 21 | 3 | 4 | 5 |
| female | 7 | 21 | 3 | 4 | 5 |

|        |   |    |   |   |   |
|--------|---|----|---|---|---|
| female | 7 | 24 | 0 | 0 | 2 |
| female | 8 | 17 | 3 | 0 | 5 |
| male   | 8 | 15 | 3 | 3 | 4 |
| male   | 8 | 19 | 7 | 7 | 5 |
| male   | 8 | 20 | 6 | 1 | 2 |
| male   | 8 | 15 | 1 | 3 | 5 |
| female | 8 | 20 | 3 | 2 | 3 |
| female | 8 | 22 | 3 | 7 | 7 |
| female | 9 | 22 | 0 | 0 | 3 |
| female | 9 | 19 | 1 | 0 | 2 |
| female | 9 | 20 | 0 | 0 | 2 |
| female | 9 | 30 | 5 | 5 | 6 |
| female | 9 | 23 | 7 | 6 | 7 |
| male   | 9 | 16 | 7 | 2 | 2 |
| female | 9 | 19 | 5 | 0 | 0 |

|        |   |    |   |   |   |
|--------|---|----|---|---|---|
| female | 9 | 20 | 5 | 0 | 1 |
| male   | 9 | 20 | 7 | 0 | 5 |
| male   | 9 | 15 | 1 | 0 | 0 |
| male   | 9 | 16 | 4 | 2 | 1 |
| male   | 9 | 27 | 7 | 3 | 7 |
| male   | 9 | 23 | 7 | 7 | 7 |
| female | 9 | 18 | 7 | 0 | 7 |
| female | 9 | 19 | 7 | 0 | 7 |
| female | 9 | 22 | 6 | 0 | 7 |
| male   | 6 | 21 | 7 | 3 | 7 |
| female | 6 | 19 | 5 | 1 | 7 |
| male   | 6 | 17 | 3 | 2 | 7 |
| female | 6 | 15 | 3 | 4 | 7 |
| female | 6 | 16 | 7 | 3 | 7 |
| male   | 7 | 18 | 7 | 4 | 7 |



|        |   |    |   |   |   |
|--------|---|----|---|---|---|
| male   | 7 | 21 | 7 | 0 | 7 |
| female | 7 | 17 | 8 | 0 | 7 |
| male   | 7 | 17 | 1 | 2 | 0 |
| male   | 7 | 13 | 0 | 2 | 7 |
| male   | 7 | 19 | 0 | 0 | 7 |
| female | 7 | 17 | 0 | 0 | 7 |
| female | 7 | 20 | 0 | 0 | 7 |
| female | 7 | 25 | 0 | 0 | 7 |
| female | 8 | 33 | 1 | 0 | 7 |
| female | 8 | 22 | 1 | 0 | 7 |
| female | 9 | 20 | 7 | 6 | 7 |
| male   | 9 | 17 | 6 | 7 | 6 |
| female | 9 | 18 | 7 | 3 | 7 |
| female | 9 | 18 | 7 | 3 | 7 |
| male   | 9 | 13 | 7 | 6 | 1 |

|        |   |    |   |   |   |
|--------|---|----|---|---|---|
| male   | 9 | 20 | 4 | 3 | 5 |
| male   | 9 | 15 | 5 | 2 | 5 |
| male   | 6 | 21 | 7 | 3 | 7 |
| female | 6 | 19 | 5 | 1 | 7 |
| male   | 6 | 17 | 3 | 2 | 7 |
| female | 6 | 15 | 3 | 4 | 7 |
| female | 6 | 16 | 7 | 3 | 7 |
| male   | 7 | 18 | 7 | 4 | 7 |
| male   | 7 | 21 | 7 | 0 | 7 |
| female | 7 | 17 | 8 | 0 | 7 |
| male   | 7 | 17 | 1 | 2 | 0 |
| male   | 7 | 13 | 0 | 2 | 7 |
| male   | 7 | 19 | 0 | 0 | 7 |
| female | 7 | 17 | 0 | 0 | 7 |
| female | 7 | 20 | 0 | 0 | 7 |

|        |   |    |   |   |   |
|--------|---|----|---|---|---|
| female | 7 | 25 | 0 | 0 | 7 |
| female | 8 | 33 | 1 | 0 | 7 |
| female | 8 | 22 | 1 | 0 | 7 |
| female | 9 | 20 | 7 | 6 | 7 |
| male   | 9 | 17 | 6 | 7 | 6 |
| female | 9 | 18 | 7 | 3 | 7 |
| female | 9 | 18 | 7 | 3 | 7 |
| male   | 9 | 13 | 7 | 6 | 1 |
| male   | 9 | 20 | 4 | 3 | 5 |
| male   | 9 | 15 | 5 | 2 | 5 |
| female | 6 | 25 | 2 | 1 | 0 |
| female | 6 | 17 | 1 | 1 | 0 |
| male   | 6 | 27 | 0 | 0 | 0 |
| female | 6 | 20 | 0 | 0 | 0 |
| female | 6 | 26 | 1 | 1 | 2 |

|        |   |    |   |   |   |
|--------|---|----|---|---|---|
| male   | 6 | 21 | 2 | 0 | 0 |
| female | 6 | 19 | 1 | 0 | 0 |
| male   | 6 | 17 | 3 | 0 | 0 |
| male   | 6 | 17 | 2 | 0 | 0 |
| male   | 6 | 16 | 2 | 0 | 0 |
| female | 7 | 21 | 2 | 0 | 3 |
| male   | 7 | 18 | 7 | 0 | 3 |
| male   | 7 | 12 | 7 | 1 | 7 |
| male   | 7 | 22 | 0 | 0 | 1 |
| male   | 7 | 15 | 1 | 1 | 0 |
| female | 7 | 15 | 7 | 0 | 7 |
| female | 7 | 15 | 7 | 1 | 7 |
| male   | 7 | 17 | 0 | 0 | 7 |
| male   | 7 | 16 | 7 | 0 | 7 |
| female | 8 | 22 | 3 | 2 | 3 |

|        |   |    |   |   |   |
|--------|---|----|---|---|---|
| female | 8 | 23 | 3 | 2 | 2 |
| female | 8 | 27 | 5 | 2 | 6 |
| female | 8 | 18 | 4 | 3 | 5 |
| female | 8 | 22 | 3 | 2 | 2 |
| male   | 8 | 18 | 5 | 5 | 2 |
| male   | 8 | 22 | 5 | 0 | 3 |
| male   | 8 | 30 | 5 | 3 | 7 |
| male   | 8 | 26 | 7 | 5 | 5 |
| male   | 8 | 19 | 3 | 4 | 5 |
| male   | 8 | 18 | 2 | 2 | 2 |
| female | 9 | 23 | 3 | 5 | 7 |
| female | 9 | 20 | 3 | 5 | 7 |
| female | 9 | 22 | 2 | 1 | 7 |
| male   | 9 | 21 | 5 | 6 | 3 |
| male   | 9 | 24 | 5 | 0 | 2 |

|        |   |    |   |   |   |
|--------|---|----|---|---|---|
| female | 9 | 18 | 2 | 1 | 2 |
| male   | 9 | 21 | 3 | 0 | 5 |
| male   | 9 | 20 | 5 | 0 | 4 |
| male   | 9 | 20 | 7 | 0 | 0 |
| male   | 9 | 17 | 4 | 0 | 2 |
| female | 6 | 21 | 7 | 2 | 0 |
| male   | 6 | 22 | 2 | 2 | 0 |
| male   | 6 | 21 | 3 | 2 | 0 |
| male   | 6 | 33 | 5 | 1 | 0 |
| male   | 6 | 19 | 4 | 0 | 0 |
| male   | 7 | 32 | 2 | 0 | 7 |
| male   | 7 | 19 | 0 | 0 | 0 |
| male   | 7 | 32 | 0 | 3 | 7 |
| male   | 7 | 21 | 0 | 1 | 7 |
| male   | 7 | 19 | 0 | 4 | 0 |

|        |   |    |   |   |   |
|--------|---|----|---|---|---|
| male   | 7 | 17 | 0 | 2 | 0 |
| male   | 7 | 31 | 0 | 3 | 7 |
| female | 7 | 18 | 1 | 0 | 0 |
| female | 7 | 19 | 1 | 0 | 0 |
| female | 7 | 17 | 1 | 0 | 0 |
| female | 8 | 20 | 7 | 5 | 2 |
| female | 8 | 19 | 7 | 1 | 1 |
| female | 8 | 27 | 7 | 5 | 1 |
| female | 8 | 17 | 7 | 3 | 5 |
| female | 8 | 22 | 7 | 6 | 3 |
| male   | 9 | 17 | 3 | 2 | 6 |
| male   | 9 | 20 | 2 | 2 | 7 |
| male   | 9 | 25 | 7 | 6 | 0 |
| male   | 9 | 25 | 7 | 1 | 0 |
| male   | 9 | 25 | 3 | 1 | 1 |

|        |   |    |   |   |   |
|--------|---|----|---|---|---|
| male   | 9 | 26 | 1 | 2 | 2 |
| male   | 9 | 14 | 5 | 2 | 0 |
| male   | 9 | 16 | 7 | 7 | 7 |
| male   | 9 | 20 | 1 | 2 | 7 |
| male   | 9 | 21 | 3 | 1 | 7 |
| male   | 9 | 20 | 7 | 3 | 1 |
| male   | 9 | 27 | 1 | 1 | 7 |
| female | 9 | 17 | 3 | 2 | 1 |
| female | 9 | 18 | 7 | 3 | 0 |
| female | 9 | 22 | 7 | 3 | 6 |
| female | 9 | 22 | 5 | 7 | 1 |
| female | 9 | 19 | 7 | 5 | 0 |
| female | 6 | 26 | 1 | 1 | 2 |
| female | 6 | 18 | 5 | 3 | 2 |
| female | 6 | 14 | 1 | 1 | 2 |



|        |   |    |   |   |   |
|--------|---|----|---|---|---|
| female | 6 | 19 | 2 | 2 | 7 |
| female | 6 | 13 | 2 | 2 | 0 |
| female | 6 | 21 | 7 | 0 | 7 |
| male   | 6 | 21 | 0 | 0 | 0 |
| male   | 6 | 27 | 0 | 0 | 7 |
| female | 7 | 19 | 7 | 0 | 6 |
| male   | 7 | 17 | 0 | 0 | 2 |
| male   | 7 | 25 | 0 | 0 | 0 |
| male   | 7 | 19 | 2 | 1 | 0 |
| female | 7 | 20 | 4 | 0 | 6 |
| female | 7 | 30 | 1 | 0 | 4 |
| male   | 8 | 16 | 7 | 7 | 0 |
| male   | 8 | 19 | 0 | 0 | 2 |
| female | 8 | 29 | 6 | 0 | 0 |
| female | 8 | 26 | 6 | 0 | 0 |

|        |   |    |   |   |   |
|--------|---|----|---|---|---|
| male   | 8 | 22 | 1 | 2 | 3 |
| female | 8 | 19 | 7 | 4 | 4 |
| male   | 8 | 36 | 3 | 2 | 3 |
| male   | 8 | 19 | 1 | 0 | 2 |
| male   | 8 | 36 | 7 | 2 | 2 |
| male   | 8 | 25 | 5 | 0 | 1 |
| male   | 8 | 21 | 2 | 1 | 7 |
| female | 8 | 18 | 0 | 0 | 7 |
| female | 8 | 20 | 0 | 0 | 3 |
| female | 8 | 15 | 0 | 0 | 7 |
| male   | 8 | 30 | 2 | 7 | 0 |
| female | 8 | 34 | 0 | 0 | 7 |
| male   | 9 | 22 | 2 | 2 | 7 |
| male   | 9 | 22 | 0 | 0 | 0 |
| male   | 9 | 17 | 0 | 0 | 0 |

|        |   |    |   |   |   |
|--------|---|----|---|---|---|
| female | 9 | 16 | 5 | 4 | 7 |
| female | 9 | 17 | 7 | 4 | 7 |
| female | 9 | 23 | 6 | 4 | 7 |
| female | 9 | 15 | 7 | 7 | 7 |
| female | 6 | 33 | 7 | 7 | 3 |
| female | 6 | 16 | 7 | 7 | 3 |
| female | 6 | 21 | 7 | 7 | 3 |
| male   | 6 | 36 | 7 | 7 | 0 |
| male   | 6 | 21 | 0 | 0 | 6 |
| male   | 6 | 19 | 7 | 2 | 5 |
| male   | 6 | 18 | 4 | 2 | 0 |
| male   | 6 | 19 | 7 | 2 | 0 |
| female | 7 | 21 | 2 | 3 | 0 |
| female | 7 | 19 | 2 | 4 | 4 |
| female | 7 | 17 | 6 | 3 | 4 |

|        |   |    |   |   |   |
|--------|---|----|---|---|---|
| male   | 7 | 32 | 5 | 5 | 6 |
| male   | 7 | 34 | 3 | 2 | 1 |
| male   | 7 | 31 | 7 | 5 | 5 |
| female | 7 | 21 | 3 | 2 | 3 |
| female | 7 | 18 | 4 | 1 | 4 |
| male   | 7 | 15 | 2 | 2 | 0 |
| male   | 8 | 22 | 2 | 3 | 7 |
| male   | 8 | 17 | 4 | 1 | 2 |
| female | 8 | 19 | 2 | 2 | 0 |
| female | 8 | 16 | 3 | 2 | 2 |
| female | 8 | 28 | 3 | 2 | 2 |
| male   | 8 | 24 | 0 | 3 | 7 |
| male   | 8 | 24 | 1 | 5 | 7 |
| male   | 8 | 18 | 1 | 0 | 7 |
| male   | 8 | 32 | 6 | 1 | 0 |

|        |   |    |   |   |   |
|--------|---|----|---|---|---|
| male   | 8 | 24 | 6 | 0 | 0 |
| male   | 8 | 16 | 0 | 0 | 0 |
| female | 8 | 17 | 0 | 0 | 3 |
| female | 8 | 23 | 0 | 0 | 7 |
| female | 9 | 15 | 0 | 0 | 0 |
| male   | 9 | 19 | 0 | 0 | 7 |
| male   | 9 | 22 | 4 | 2 | 3 |
| male   | 9 | 26 | 2 | 3 | 3 |
| female | 9 | 26 | 7 | 7 | 1 |
| female | 9 | 42 | 7 | 7 | 5 |
| female | 9 | 33 | 2 | 0 | 5 |
| female | 9 | 12 | 5 | 5 | 7 |
| female | 9 | 27 | 1 | 0 | 0 |
| male   | 9 | 21 | 3 | 4 | 1 |
| male   | 9 | 28 | 0 | 3 | 2 |

|        |   |    |   |   |   |
|--------|---|----|---|---|---|
| male   | 6 | 22 | 2 | 3 | 3 |
| female | 6 | 20 | 2 | 2 | 1 |
| male   | 6 | 21 | 5 | 5 | 7 |
| female | 6 | 27 | 1 | 1 | 7 |
| male   | 6 | 17 | 0 | 0 | 0 |
| male   | 7 | 26 | 7 | 6 | 7 |
| male   | 7 | 46 | 7 | 7 | 7 |
| female | 7 | 20 | 6 | 4 | 7 |
| female | 7 | 20 | 7 | 3 | 7 |
| male   | 7 | 19 | 0 | 0 | 7 |
| female | 7 | 29 | 3 | 1 | 2 |
| male   | 7 | 24 | 1 | 0 | 0 |
| male   | 7 | 15 | 2 | 0 | 0 |
| female | 7 | 22 | 0 | 1 | 0 |
| male   | 8 | 35 | 0 | 1 | 7 |

|        |   |    |   |   |   |
|--------|---|----|---|---|---|
| female | 8 | 38 | 3 | 0 | 1 |
| male   | 8 | 28 | 2 | 3 | 3 |
| female | 8 | 21 | 1 | 2 | 7 |
| male   | 8 | 21 | 0 | 0 | 7 |
| male   | 8 | 23 | 4 | 4 | 7 |
| female | 9 | 24 | 5 | 4 | 4 |
| male   | 9 | 18 | 7 | 7 | 5 |
| female | 6 | 19 | 2 | 3 | 7 |
| male   | 6 | 18 | 7 | 0 | 6 |
| female | 6 | 19 | 7 | 7 | 0 |
| female | 6 | 18 | 2 | 1 | 5 |
| male   | 6 | 33 | 5 | 3 | 6 |
| male   | 7 | 18 | 7 | 0 | 5 |
| female | 7 | 25 | 7 | 2 | 0 |
| female | 7 | 22 | 3 | 2 | 0 |

|        |   |    |   |   |   |
|--------|---|----|---|---|---|
| male   | 7 | 18 | 1 | 5 | 7 |
| female | 7 | 20 | 3 | 2 | 7 |
| male   | 7 | 20 | 5 | 3 | 7 |
| male   | 7 | 22 | 7 | 7 | 7 |
| female | 8 | 21 | 3 | 0 | 2 |
| male   | 8 | 22 | 3 | 2 | 2 |
| female | 9 | 21 | 1 | 0 | 3 |
| female | 9 | 21 | 7 | 0 | 2 |
| male   | 9 | 17 | 6 | 7 | 6 |
| female | 9 | 20 | 4 | 0 | 2 |
| male   | 9 | 23 | 5 | 7 | 7 |
| male   | 9 | 23 | 5 | 7 | 7 |
| male   | 9 | 24 | 6 | 7 | 1 |
| female | 9 | 25 | 1 | 2 | 1 |
| female | 9 | 21 | 3 | 2 | 1 |



|        |   |    |   |   |   |
|--------|---|----|---|---|---|
| female | 9 | 19 | 3 | 2 | 1 |
| male   | 6 | 18 | 3 | 3 | 4 |
| male   | 6 | 15 | 4 | 6 | 3 |
| male   | 6 | 16 | 3 | 5 | 6 |
| female | 6 | 31 | 2 | 5 | 3 |
| female | 6 | 33 | 2 | 3 | 2 |
| female | 6 | 33 | 0 | 0 | 1 |
| male   | 7 | 24 | 7 | 2 | 0 |
| male   | 7 | 13 | 5 | 3 | 0 |
| male   | 7 | 12 | 7 | 4 | 0 |
| female | 8 | 20 | 5 | 3 | 2 |
| female | 8 | 22 | 5 | 3 | 2 |
| female | 8 | 22 | 5 | 3 | 2 |
| male   | 8 | 20 | 2 | 2 | 4 |
| male   | 8 | 21 | 7 | 2 | 7 |

|        |   |    |   |   |   |
|--------|---|----|---|---|---|
| male   | 8 | 25 | 7 | 7 | 7 |
| male   | 9 | 19 | 0 | 2 | 0 |
| male   | 9 | 18 | 0 | 2 | 1 |
| male   | 9 | 22 | 0 | 2 | 4 |
| female | 9 | 19 | 4 | 0 | 3 |
| female | 9 | 15 | 2 | 0 | 4 |
| female | 9 | 23 | 2 | 0 | 3 |
| female | 6 | 29 | 4 | 0 | 1 |
| female | 6 | 42 | 2 | 0 | 2 |
| male   | 7 | 34 | 1 | 2 | 7 |
| male   | 7 | 20 | 0 | 7 | 0 |
| male   | 7 | 34 | 0 | 3 | 0 |
| female | 7 | 22 | 1 | 2 | 1 |
| male   | 7 | 29 | 7 | 0 | 5 |
| female | 7 | 23 | 3 | 4 | 7 |

|        |   |    |   |   |   |
|--------|---|----|---|---|---|
| male   | 7 | 37 | 2 | 0 | 2 |
| male   | 7 | 32 | 2 | 0 | 2 |
| female | 7 | 16 | 4 | 0 | 7 |
| male   | 8 | 24 | 3 | 5 | 2 |
| male   | 8 | 30 | 4 | 6 | 3 |
| male   | 8 | 21 | 2 | 5 | 2 |
| female | 9 | 22 | 3 | 3 | 7 |
| female | 9 | 20 | 3 | 3 | 7 |
| female | 9 | 11 | 0 | 0 | 7 |
| female | 9 | 25 | 7 | 0 | 0 |
| male   | 9 | 22 | 5 | 3 | 7 |
| male   | 9 | 18 | 2 | 1 | 2 |
| female | 9 | 24 | 0 | 0 | 0 |
| female | 9 | 24 | 1 | 0 | 0 |

|        |    |    |   |   |   |
|--------|----|----|---|---|---|
| male   | 10 | 16 | 2 | 0 | 0 |
| male   | 10 | 10 | 2 | 0 | 0 |
| female | 10 | 19 | 5 | 5 | 4 |
| female | 10 | 26 | 5 | 3 | 5 |
| female | 10 | 27 | 4 | 3 | 7 |
| female | 11 | 28 | 1 | 1 | 7 |
| female | 11 | 29 | 1 | 1 | 2 |
| female | 11 | 33 | 1 | 1 | 2 |
| male   | 11 | 17 | 1 | 4 | 0 |
| male   | 11 | 17 | 2 | 1 | 0 |
| male   | 11 | 26 | 2 | 5 | 2 |
| male   | 10 | 12 | 7 | 4 | 7 |
| female | 10 | 18 | 6 | 6 | 7 |
| female | 10 | 17 | 6 | 6 | 0 |
| female | 10 | 17 | 7 | 7 | 7 |

|        |    |    |   |   |   |
|--------|----|----|---|---|---|
| female | 10 | 24 | 7 | 7 | 7 |
| male   | 11 | 23 | 5 | 7 | 1 |
| male   | 11 | 22 | 0 | 0 | 7 |
| male   | 11 | 25 | 7 | 0 | 7 |
| female | 11 | 22 | 2 | 4 | 3 |
| female | 11 | 29 | 5 | 0 | 2 |
| female | 11 | 19 | 7 | 5 | 6 |
| female | 11 | 16 | 7 | 2 | 7 |
| male   | 12 | 21 | 5 | 7 | 1 |
| male   | 10 | 20 | 7 | 5 | 5 |
| female | 10 | 21 | 2 | 0 | 1 |
| female | 10 | 20 | 3 | 0 | 4 |
| female | 10 | 17 | 2 | 2 | 2 |
| female | 10 | 25 | 3 | 2 | 2 |
| female | 10 | 20 | 2 | 0 | 1 |

|        |    |    |   |   |   |
|--------|----|----|---|---|---|
| male   | 10 | 19 | 5 | 1 | 3 |
| male   | 10 | 14 | 2 | 1 | 1 |
| female | 11 | 16 | 0 | 0 | 2 |
| female | 11 | 16 | 3 | 1 | 0 |
| female | 11 | 17 | 3 | 1 | 4 |
| female | 11 | 18 | 5 | 1 | 3 |
| male   | 11 | 21 | 2 | 0 | 0 |
| male   | 11 | 27 | 1 | 0 | 5 |
| male   | 11 | 17 | 1 | 0 | 1 |
| female | 11 | 16 | 0 | 0 | 4 |
| female | 11 | 41 | 3 | 2 | 1 |
| female | 12 | 19 | 2 | 1 | 3 |
| female | 12 | 15 | 4 | 0 | 5 |
| female | 12 | 15 | 2 | 0 | 5 |
| female | 12 | 15 | 3 | 0 | 6 |

|        |    |    |   |   |   |
|--------|----|----|---|---|---|
| male   | 12 | 19 | 5 | 3 | 6 |
| male   | 12 | 15 | 4 | 2 | 6 |
| male   | 12 | 18 | 4 | 2 | 6 |
| male   | 13 | 15 | 1 | 0 | 3 |
| female | 13 | 23 | 3 | 2 | 7 |
| female | 13 | 20 | 2 | 1 | 3 |
| male   | 13 | 18 | 5 | 3 | 2 |
| male   | 13 | 18 | 5 | 5 | 3 |
| female | 10 | 17 | 0 | 3 | 2 |
| male   | 10 | 20 | 7 | 7 | 0 |
| male   | 10 | 21 | 0 | 3 | 2 |
| female | 10 | 20 | 3 | 3 | 0 |
| male   | 10 | 28 | 7 | 4 | 0 |
| male   | 10 | 24 | 3 | 1 | 1 |
| male   | 10 | 19 | 2 | 2 | 2 |

|        |    |    |   |   |   |
|--------|----|----|---|---|---|
| male   | 10 | 25 | 1 | 1 | 1 |
| male   | 11 | 19 | 3 | 1 | 7 |
| female | 11 | 19 | 2 | 2 | 2 |
| male   | 11 | 18 | 0 | 0 | 0 |
| female | 11 | 16 | 7 | 0 | 0 |
| female | 11 | 30 | 7 | 7 | 2 |
| male   | 11 | 9  | 4 | 0 | 5 |
| male   | 10 | 21 | 7 | 0 | 7 |
| female | 10 | 20 | 7 | 3 | 6 |
| female | 10 | 26 | 1 | 2 | 3 |
| female | 10 | 22 | 7 | 2 | 7 |
| male   | 10 | 18 | 7 | 0 | 7 |
| male   | 10 | 23 | 7 | 7 | 0 |
| male   | 10 | 27 | 6 | 2 | 7 |
| female | 11 | 23 | 7 | 0 | 7 |



|        |    |    |   |   |   |
|--------|----|----|---|---|---|
| female | 11 | 19 | 3 | 0 | 3 |
| male   | 11 | 17 | 7 | 1 | 7 |
| female | 11 | 16 | 2 | 0 | 6 |
| female | 10 | 10 | 2 | 2 | 7 |
| male   | 10 | 19 | 0 | 0 | 0 |
| male   | 10 | 21 | 0 | 0 | 7 |
| male   | 10 | 15 | 6 | 5 | 7 |
| female | 10 | 23 | 3 | 4 | 6 |
| female | 10 | 23 | 4 | 3 | 3 |
| female | 11 | 28 | 4 | 0 | 7 |
| male   | 11 | 21 | 7 | 4 | 2 |
| male   | 11 | 23 | 7 | 2 | 3 |
| male   | 11 | 22 | 4 | 3 | 1 |
| male   | 11 | 18 | 0 | 3 | 0 |
| male   | 11 | 20 | 7 | 0 | 0 |

|        |    |    |   |   |   |
|--------|----|----|---|---|---|
| female | 10 | 17 | 0 | 0 | 7 |
| male   | 10 | 22 | 1 | 4 | 2 |
| female | 10 | 19 | 1 | 0 | 5 |
| female | 10 | 17 | 1 | 0 | 3 |
| male   | 11 | 20 | 0 | 0 | 7 |
| female | 11 | 10 | 2 | 5 | 2 |
| female | 11 | 12 | 3 | 5 | 2 |
| female | 11 | 16 | 3 | 4 | 3 |
| female | 11 | 19 | 2 | 3 | 2 |
| female | 11 | 16 | 3 | 1 | 0 |
| female | 11 | 16 | 7 | 0 | 0 |
| male   | 11 | 19 | 1 | 2 | 1 |
| female | 12 | 18 | 7 | 3 | 5 |
| female | 12 | 23 | 7 | 3 | 5 |
| male   | 12 | 24 | 4 | 5 | 0 |

|        |    |    |   |   |   |
|--------|----|----|---|---|---|
| female | 12 | 23 | 5 | 4 | 0 |
| male   | 13 | 32 | 7 | 0 | 7 |
| female | 13 | 12 | 5 | 2 | 2 |
| female | 13 | 20 | 3 | 2 | 5 |
| male   | 13 | 16 | 7 | 5 | 1 |
| female | 13 | 15 | 5 | 2 | 7 |
| female | 10 | 14 | 1 | 2 | 2 |
| female | 10 | 17 | 1 | 3 | 2 |
| female | 10 | 14 | 2 | 1 | 1 |
| female | 10 | 14 | 1 | 1 | 1 |
| male   | 10 | 16 | 1 | 0 | 6 |
| female | 10 | 19 | 1 | 2 | 1 |
| male   | 11 | 16 | 7 | 7 | 7 |
| male   | 11 | 16 | 7 | 7 | 7 |
| female | 11 | 18 | 1 | 3 | 1 |

|        |    |    |   |   |   |
|--------|----|----|---|---|---|
| male   | 10 | 19 | 3 | 3 | 3 |
| male   | 10 | 11 | 2 | 0 | 1 |
| female | 10 | 24 | 2 | 1 | 4 |
| female | 10 | 23 | 2 | 3 | 3 |
| female | 10 | 23 | 2 | 7 | 7 |
| male   | 10 | 16 | 5 | 5 | 3 |
| male   | 10 | 13 | 5 | 5 | 0 |
| male   | 10 | 18 | 3 | 2 | 2 |
| male   | 10 | 16 | 5 | 1 | 2 |
| female | 10 | 19 | 3 | 2 | 3 |
| female | 10 | 16 | 4 | 2 | 2 |
| female | 10 | 16 | 2 | 1 | 1 |
| female | 11 | 24 | 6 | 1 | 2 |
| female | 11 | 23 | 5 | 1 | 2 |
| male   | 11 | 20 | 3 | 2 | 2 |

|        |    |    |   |   |   |
|--------|----|----|---|---|---|
| female | 11 | 15 | 4 | 4 | 3 |
| male   | 11 | 19 | 5 | 6 | 3 |
| male   | 11 | 17 | 4 | 5 | 7 |
| male   | 11 | 21 | 5 | 5 | 6 |
| female | 11 | 19 | 2 | 1 | 5 |
| female | 11 | 18 | 4 | 1 | 5 |
| female | 11 | 21 | 2 | 1 | 5 |
| male   | 12 | 29 | 6 | 6 | 2 |
| female | 12 | 26 | 5 | 5 | 3 |
| female | 12 | 24 | 1 | 0 | 7 |
| male   | 12 | 17 | 3 | 2 | 7 |
| male   | 12 | 20 | 3 | 2 | 7 |
| female | 12 | 14 | 6 | 6 | 6 |
| female | 12 | 16 | 1 | 0 | 1 |
| male   | 12 | 18 | 3 | 2 | 7 |

|        |    |    |   |   |   |
|--------|----|----|---|---|---|
| female | 13 | 24 | 7 | 7 | 0 |
| female | 13 | 24 | 2 | 3 | 4 |
| male   | 13 | 23 | 3 | 1 | 5 |
| male   | 13 | 19 | 6 | 6 | 0 |
| male   | 13 | 19 | 5 | 5 | 0 |
| male   | 13 | 26 | 3 | 3 | 7 |
| female | 13 | 23 | 1 | 0 | 3 |
| female | 10 | 17 | 3 | 2 | 3 |
| male   | 10 | 21 | 1 | 1 | 2 |
| male   | 10 | 18 | 2 | 1 | 3 |
| female | 10 | 18 | 4 | 2 | 7 |
| female | 10 | 15 | 2 | 2 | 3 |
| male   | 10 | 16 | 0 | 1 | 0 |
| male   | 11 | 22 | 5 | 3 | 7 |
| male   | 11 | 21 | 3 | 0 | 3 |

|        |    |    |   |   |   |
|--------|----|----|---|---|---|
| female | 11 | 25 | 3 | 0 | 7 |
| male   | 11 | 19 | 6 | 0 | 7 |
| female | 11 | 19 | 4 | 2 | 4 |
| female | 10 | 17 | 3 | 2 | 3 |
| male   | 10 | 21 | 1 | 1 | 2 |
| male   | 10 | 18 | 2 | 1 | 3 |
| female | 10 | 18 | 4 | 2 | 7 |
| female | 10 | 15 | 2 | 2 | 3 |
| male   | 10 | 16 | 0 | 1 | 0 |
| male   | 11 | 22 | 5 | 3 | 7 |
| male   | 11 | 21 | 3 | 0 | 3 |
| female | 11 | 25 | 3 | 0 | 7 |
| male   | 11 | 19 | 6 | 0 | 7 |
| female | 11 | 19 | 4 | 2 | 4 |
| female | 12 | 28 | 2 | 0 | 7 |

|        |    |    |   |   |   |
|--------|----|----|---|---|---|
| female | 12 | 21 | 2 | 1 | 7 |
| female | 12 | 16 | 2 | 1 | 0 |
| female | 12 | 25 | 3 | 2 | 0 |
| female | 12 | 25 | 4 | 1 | 0 |
| female | 12 | 17 | 5 | 5 | 1 |
| male   | 12 | 21 | 4 | 1 | 2 |
| male   | 12 | 19 | 5 | 0 | 2 |
| male   | 12 | 19 | 4 | 6 | 2 |
| male   | 13 | 21 | 2 | 2 | 3 |
| female | 13 | 29 | 2 | 2 | 0 |
| female | 13 | 30 | 3 | 3 | 0 |
| female | 13 | 20 | 6 | 3 | 3 |
| male   | 13 | 21 | 2 | 2 | 1 |
| male   | 13 | 21 | 3 | 2 | 1 |
| male   | 13 | 20 | 4 | 2 | 2 |



|        |    |    |   |   |   |
|--------|----|----|---|---|---|
| male   | 13 | 30 | 4 | 2 | 2 |
| male   | 13 | 20 | 2 | 0 | 4 |
| female | 13 | 21 | 5 | 0 | 7 |
| female | 12 | 18 | 7 | 5 | 2 |
| male   | 12 | 23 | 7 | 2 | 7 |
| female | 12 | 20 | 7 | 5 | 2 |
| female | 12 | 22 | 1 | 0 | 1 |
| male   | 12 | 21 | 7 | 7 | 4 |
| female | 13 | 18 | 3 | 0 | 7 |
| male   | 13 | 19 | 7 | 7 | 0 |
| male   | 13 | 21 | 3 | 4 | 3 |
| male   | 13 | 18 | 7 | 4 | 5 |
| female | 13 | 19 | 0 | 1 | 7 |
| male   | 13 | 13 | 1 | 1 | 1 |
| male   | 13 | 19 | 3 | 3 | 2 |

|        |    |    |   |   |   |
|--------|----|----|---|---|---|
| female | 10 | 21 | 3 | 1 | 7 |
| female | 10 | 18 | 5 | 1 | 1 |
| female | 10 | 24 | 2 | 1 | 7 |
| female | 10 | 23 | 1 | 5 | 7 |
| male   | 10 | 14 | 4 | 3 | 7 |
| male   | 10 | 14 | 1 | 3 | 2 |
| male   | 10 | 18 | 0 | 0 | 0 |
| male   | 10 | 17 | 7 | 0 | 0 |
| female | 10 | 21 | 2 | 0 | 7 |
| male   | 11 | 18 | 4 | 3 | 4 |
| male   | 11 | 20 | 5 | 0 | 1 |
| female | 11 | 20 | 7 | 7 | 4 |
| male   | 11 | 19 | 3 | 7 | 4 |
| female | 11 | 19 | 7 | 6 | 4 |
| female | 11 | 15 | 3 | 2 | 1 |

|        |    |    |   |   |   |
|--------|----|----|---|---|---|
| male   | 11 | 19 | 7 | 2 | 5 |
| male   | 11 | 17 | 7 | 6 | 2 |
| male   | 11 | 22 | 7 | 5 | 0 |
| female | 12 | 20 | 4 | 3 | 1 |
| female | 12 | 31 | 4 | 3 | 1 |
| female | 12 | 26 | 5 | 2 | 0 |
| female | 12 | 22 | 3 | 2 | 3 |
| male   | 12 | 19 | 3 | 5 | 7 |
| male   | 12 | 26 | 3 | 5 | 7 |
| male   | 12 | 28 | 2 | 4 | 7 |
| male   | 12 | 27 | 2 | 0 | 2 |
| male   | 12 | 25 | 5 | 4 | 2 |
| male   | 12 | 24 | 2 | 4 | 1 |
| male   | 13 | 29 | 3 | 2 | 7 |
| female | 13 | 40 | 5 | 2 | 0 |

|        |    |    |   |   |   |
|--------|----|----|---|---|---|
| female | 13 | 25 | 5 | 4 | 0 |
| female | 13 | 24 | 5 | 0 | 0 |
| female | 13 | 22 | 0 | 1 | 7 |
| female | 13 | 24 | 1 | 0 | 7 |
| male   | 13 | 27 | 3 | 3 | 5 |
| male   | 13 | 30 | 2 | 3 | 4 |
| male   | 13 | 29 | 5 | 5 | 3 |
| male   | 13 | 29 | 3 | 3 | 0 |
| male   | 13 | 23 | 3 | 6 | 7 |
| female | 13 | 39 | 0 | 0 | 5 |
| female | 13 | 21 | 1 | 0 | 7 |
| female | 13 | 31 | 1 | 0 | 1 |
| female | 13 | 23 | 2 | 2 | 1 |
| female | 13 | 22 | 2 | 0 | 7 |
| male   | 13 | 24 | 2 | 0 | 0 |

|        |    |    |   |   |   |
|--------|----|----|---|---|---|
| male   | 13 | 31 | 6 | 3 | 4 |
| male   | 13 | 31 | 5 | 4 | 3 |
| male   | 13 | 29 | 7 | 7 | 7 |
| male   | 13 | 23 | 6 | 3 | 7 |
| male   | 13 | 30 | 5 | 4 | 3 |
| female | 13 | 15 | 3 | 0 | 7 |
| female | 10 | 23 | 2 | 0 | 7 |
| female | 10 | 21 | 2 | 1 | 7 |
| female | 10 | 24 | 0 | 0 | 7 |
| female | 10 | 31 | 5 | 5 | 7 |
| female | 10 | 22 | 3 | 2 | 7 |
| female | 10 | 27 | 7 | 7 | 7 |
| male   | 10 | 22 | 7 | 7 | 7 |
| male   | 10 | 19 | 3 | 1 | 7 |
| male   | 10 | 28 | 6 | 5 | 7 |

|        |    |    |   |   |   |
|--------|----|----|---|---|---|
| male   | 10 | 27 | 5 | 3 | 7 |
| male   | 11 | 23 | 5 | 2 | 3 |
| male   | 11 | 17 | 4 | 3 | 2 |
| male   | 11 | 16 | 7 | 7 | 5 |
| female | 11 | 21 | 3 | 7 | 1 |
| female | 11 | 31 | 3 | 7 | 0 |
| male   | 11 | 22 | 5 | 4 | 0 |
| female | 11 | 26 | 4 | 4 | 1 |
| female | 11 | 20 | 7 | 7 | 7 |
| male   | 11 | 31 | 2 | 0 | 2 |
| male   | 11 | 30 | 7 | 5 | 4 |
| female | 11 | 18 | 3 | 3 | 2 |
| male   | 12 | 19 | 1 | 0 | 0 |
| female | 12 | 25 | 1 | 0 | 0 |
| female | 12 | 27 | 1 | 0 | 0 |

|        |    |    |   |   |   |
|--------|----|----|---|---|---|
| male   | 12 | 19 | 2 | 1 | 3 |
| female | 12 | 19 | 3 | 0 | 0 |
| male   | 12 | 19 | 2 | 2 | 6 |
| female | 12 | 20 | 2 | 1 | 1 |
| female | 12 | 33 | 1 | 0 | 3 |
| male   | 12 | 35 | 1 | 0 | 6 |
| male   | 12 | 21 | 7 | 2 | 6 |
| male   | 12 | 31 | 3 | 2 | 4 |
| male   | 12 | 20 | 3 | 2 | 4 |
| male   | 12 | 21 | 4 | 4 | 0 |
| male   | 12 | 34 | 5 | 0 | 7 |
| female | 13 | 27 | 7 | 2 | 0 |
| male   | 13 | 21 | 4 | 4 | 0 |
| male   | 13 | 19 | 4 | 4 | 0 |
| female | 13 | 12 | 4 | 2 | 3 |

|        |    |    |   |   |   |
|--------|----|----|---|---|---|
| female | 13 | 12 | 2 | 1 | 3 |
| female | 13 | 12 | 2 | 1 | 0 |
| female | 13 | 12 | 3 | 2 | 0 |
| male   | 13 | 25 | 7 | 2 | 2 |
| male   | 13 | 21 | 7 | 2 | 3 |
| male   | 13 | 16 | 7 | 5 | 7 |
| male   | 12 | 25 | 7 | 3 | 7 |
| male   | 12 | 21 | 3 | 2 | 1 |
| male   | 12 | 21 | 1 | 5 | 3 |
| male   | 12 | 26 | 3 | 7 | 3 |
| male   | 12 | 26 | 4 | 7 | 5 |
| male   | 12 | 20 | 5 | 1 | 2 |
| male   | 12 | 20 | 3 | 3 | 3 |
| female | 12 | 21 | 1 | 0 | 6 |
| female | 12 | 17 | 7 | 7 | 7 |



|        |    |    |   |   |   |
|--------|----|----|---|---|---|
| female | 12 | 22 | 5 | 1 | 3 |
| female | 12 | 18 | 7 | 1 | 0 |
| female | 12 | 18 | 7 | 7 | 7 |
| female | 12 | 20 | 3 | 1 | 6 |
| female | 12 | 18 | 4 | 3 | 6 |
| female | 12 | 21 | 1 | 0 | 2 |
| male   | 13 | 20 | 7 | 7 | 0 |
| female | 13 | 24 | 7 | 3 | 0 |
| female | 13 | 19 | 1 | 2 | 0 |
| male   | 13 | 23 | 5 | 3 | 0 |
| male   | 13 | 24 | 2 | 4 | 0 |
| male   | 13 | 23 | 7 | 6 | 2 |
| male   | 13 | 22 | 0 | 2 | 2 |
| male   | 13 | 24 | 3 | 5 | 3 |
| male   | 13 | 18 | 6 | 3 | 0 |

|        |    |    |   |   |   |
|--------|----|----|---|---|---|
| male   | 13 | 26 | 6 | 1 | 2 |
| male   | 10 | 36 | 6 | 4 | 7 |
| male   | 10 | 20 | 7 | 7 | 3 |
| male   | 10 | 22 | 1 | 4 | 5 |
| male   | 10 | 20 | 4 | 2 | 2 |
| male   | 10 | 27 | 4 | 3 | 4 |
| female | 10 | 22 | 0 | 0 | 0 |
| female | 10 | 26 | 2 | 0 | 0 |
| male   | 11 | 23 | 2 | 4 | 6 |
| female | 11 | 18 | 7 | 7 | 7 |
| female | 11 | 24 | 4 | 1 | 7 |
| male   | 11 | 22 | 5 | 4 | 0 |
| male   | 11 | 24 | 0 | 0 | 7 |
| female | 11 | 27 | 5 | 3 | 0 |
| female | 11 | 36 | 1 | 0 | 7 |

|        |    |    |   |   |   |
|--------|----|----|---|---|---|
| female | 11 | 24 | 7 | 7 | 3 |
| female | 11 | 29 | 4 | 7 | 2 |
| female | 11 | 19 | 2 | 0 | 0 |
| male   | 11 | 24 | 7 | 1 | 7 |
| female | 11 | 36 | 3 | 4 | 7 |
| male   | 11 | 13 | 6 | 3 | 1 |
| male   | 11 | 22 | 3 | 1 | 1 |
| male   | 11 | 22 | 6 | 2 | 7 |
| male   | 11 | 20 | 3 | 1 | 0 |
| male   | 11 | 24 | 1 | 1 | 0 |
| male   | 12 | 36 | 3 | 0 | 3 |
| male   | 12 | 33 | 3 | 0 | 2 |
| male   | 12 | 30 | 7 | 7 | 4 |
| male   | 12 | 28 | 6 | 2 | 5 |
| male   | 12 | 29 | 7 | 7 | 3 |

|        |    |    |   |   |   |
|--------|----|----|---|---|---|
| male   | 12 | 33 | 7 | 0 | 0 |
| female | 12 | 37 | 6 | 2 | 2 |
| female | 12 | 40 | 4 | 2 | 2 |
| female | 12 | 36 | 4 | 2 | 1 |
| female | 13 | 31 | 7 | 7 | 7 |
| female | 12 | 22 | 1 | 1 | 1 |
| female | 12 | 24 | 1 | 1 | 7 |
| female | 12 | 27 | 7 | 3 | 3 |
| male   | 12 | 19 | 4 | 3 | 4 |
| male   | 12 | 21 | 6 | 3 | 1 |
| male   | 12 | 28 | 4 | 2 | 1 |
| male   | 12 | 19 | 5 | 5 | 5 |
| female | 12 | 35 | 4 | 7 | 7 |
| female | 12 | 19 | 3 | 2 | 7 |
| male   | 13 | 26 | 1 | 0 | 2 |

|        |    |    |   |   |   |
|--------|----|----|---|---|---|
| male   | 13 | 25 | 7 | 7 | 7 |
| male   | 13 | 28 | 7 | 7 | 3 |
| male   | 13 | 26 | 4 | 3 | 7 |
| male   | 13 | 23 | 4 | 0 | 7 |
| female | 13 | 26 | 3 | 4 | 4 |
| female | 13 | 23 | 7 | 5 | 6 |
| female | 13 | 23 | 3 | 1 | 5 |
| female | 13 | 27 | 4 | 1 | 7 |
| female | 12 | 36 | 2 | 0 | 0 |
| male   | 12 | 23 | 5 | 3 | 3 |
| male   | 12 | 22 | 6 | 2 | 2 |
| male   | 12 | 23 | 3 | 0 | 7 |
| male   | 12 | 35 | 5 | 0 | 7 |
| female | 12 | 24 | 0 | 0 | 0 |
| female | 12 | 22 | 0 | 0 | 0 |

|        |    |    |   |   |   |
|--------|----|----|---|---|---|
| female | 12 | 18 | 3 | 0 | 0 |
| female | 12 | 23 | 0 | 0 | 2 |
| female | 13 | 23 | 4 | 2 | 0 |
| female | 13 | 33 | 5 | 7 | 7 |
| female | 13 | 21 | 3 | 4 | 0 |
| female | 13 | 22 | 3 | 1 | 0 |
| female | 13 | 19 | 5 | 3 | 0 |
| male   | 13 | 24 | 3 | 4 | 0 |
| male   | 13 | 19 | 5 | 6 | 5 |
| female | 13 | 20 | 3 | 2 | 0 |
| male   | 10 | 31 | 3 | 6 | 1 |
| male   | 10 | 17 | 4 | 4 | 0 |
| female | 10 | 43 | 0 | 3 | 6 |
| female | 10 | 23 | 5 | 5 | 7 |
| female | 10 | 36 | 3 | 0 | 7 |

|        |    |    |   |   |   |
|--------|----|----|---|---|---|
| male   | 10 | 18 | 5 | 5 | 2 |
| female | 10 | 22 | 3 | 0 | 6 |
| male   | 10 | 27 | 7 | 4 | 7 |
| female | 10 | 29 | 7 | 0 | 0 |
| male   | 10 | 28 | 3 | 3 | 7 |
| male   | 11 | 38 | 2 | 1 | 1 |
| male   | 11 | 31 | 3 | 0 | 0 |
| male   | 11 | 16 | 5 | 3 | 0 |
| male   | 11 | 36 | 7 | 2 | 1 |
| male   | 11 | 17 | 7 | 2 | 7 |
| male   | 11 | 20 | 7 | 2 | 1 |
| female | 11 | 23 | 1 | 2 | 7 |
| female | 11 | 30 | 1 | 3 | 4 |
| female | 11 | 23 | 1 | 0 | 7 |
| female | 11 | 19 | 5 | 1 | 2 |

|        |    |    |   |   |   |
|--------|----|----|---|---|---|
| female | 11 | 26 | 3 | 1 | 5 |
| male   | 11 | 31 | 5 | 3 | 0 |
| male   | 10 | 38 | 5 | 7 | 0 |
| male   | 10 | 28 | 1 | 0 | 0 |
| male   | 10 | 29 | 0 | 2 | 5 |
| female | 10 | 26 | 1 | 6 | 5 |
| male   | 10 | 23 | 0 | 0 | 0 |
| female | 10 | 20 | 7 | 0 | 0 |
| female | 11 | 24 | 0 | 0 | 5 |
| male   | 11 | 35 | 7 | 7 | 0 |
| female | 11 | 41 | 1 | 6 | 6 |
| male   | 11 | 28 | 7 | 0 | 2 |
| male   | 11 | 26 | 7 | 7 | 0 |
| female | 11 | 24 | 0 | 1 | 7 |
| female | 11 | 19 | 0 | 0 | 7 |



|        |    |    |   |   |   |
|--------|----|----|---|---|---|
| male   | 12 | 27 | 2 | 2 | 0 |
| female | 12 | 25 | 0 | 0 | 7 |
| male   | 12 | 19 | 3 | 0 | 1 |
| male   | 12 | 23 | 7 | 7 | 0 |
| male   | 10 | 17 | 5 | 0 | 0 |
| female | 10 | 28 | 3 | 1 | 7 |
| female | 10 | 21 | 4 | 1 | 2 |
| female | 10 | 17 | 7 | 5 | 0 |
| female | 10 | 18 | 7 | 5 | 0 |
| male   | 10 | 32 | 4 | 1 | 0 |
| male   | 11 | 20 | 7 | 6 | 3 |
| female | 11 | 19 | 5 | 6 | 4 |
| female | 11 | 28 | 2 | 1 | 5 |
| male   | 11 | 39 | 7 | 5 | 2 |
| male   | 11 | 42 | 2 | 5 | 3 |

|        |    |    |   |   |   |
|--------|----|----|---|---|---|
| female | 10 | 28 | 3 | 1 | 6 |
| female | 10 | 29 | 5 | 1 | 6 |
| male   | 10 | 34 | 2 | 0 | 2 |
| female | 10 | 31 | 1 | 0 | 2 |
| male   | 10 | 31 | 4 | 4 | 1 |
| male   | 10 | 30 | 2 | 3 | 6 |
| male   | 11 | 34 | 1 | 0 | 0 |
| male   | 11 | 30 | 3 | 0 | 3 |
| male   | 11 | 19 | 5 | 0 | 0 |
| female | 11 | 14 | 1 | 1 | 2 |
| female | 11 | 21 | 1 | 1 | 2 |
| female | 11 | 20 | 1 | 0 | 2 |
| female | 12 | 23 | 2 | 1 | 3 |
| female | 12 | 27 | 3 | 2 | 5 |
| female | 12 | 27 | 3 | 2 | 1 |

|        |    |    |   |   |   |
|--------|----|----|---|---|---|
| female | 12 | 15 | 1 | 3 | 1 |
| male   | 12 | 25 | 3 | 1 | 0 |
| female | 12 | 23 | 1 | 3 | 1 |
| male   | 12 | 34 | 3 | 4 | 3 |
| male   | 12 | 19 | 2 | 7 | 2 |
| male   | 12 | 16 | 3 | 2 | 0 |
| female | 13 | 21 | 4 | 0 | 0 |
| female | 13 | 39 | 4 | 0 | 0 |
| male   | 13 | 26 | 3 | 2 | 4 |
| male   | 13 | 20 | 3 | 2 | 1 |
| male   | 13 | 22 | 1 | 1 | 2 |
| male   | 10 | 24 | 7 | 1 | 2 |
| male   | 11 | 22 | 7 | 0 | 2 |
| male   | 11 | 25 | 4 | 5 | 1 |
| female | 11 | 28 | 0 | 0 | 2 |

|        |    |    |   |   |   |
|--------|----|----|---|---|---|
| male   | 11 | 20 | 7 | 5 | 7 |
| male   | 11 | 26 | 7 | 5 | 4 |
| male   | 11 | 21 | 7 | 7 | 5 |
| female | 11 | 39 | 2 | 0 | 1 |
| female | 11 | 39 | 1 | 0 | 7 |
| male   | 12 | 29 | 5 | 5 | 4 |
| male   | 12 | 30 | 7 | 5 | 0 |

|        |    |    |   |   |   |
|--------|----|----|---|---|---|
| female | 14 | 21 | 5 | 1 | 0 |
| male   | 14 | 23 | 3 | 7 | 1 |
| male   | 14 | 18 | 3 | 3 | 1 |
| male   | 14 | 14 | 3 | 7 | 1 |
| male   | 14 | 28 | 3 | 5 | 1 |
| male   | 15 | 20 | 2 | 2 | 1 |
| male   | 14 | 22 | 7 | 7 | 7 |

|        |    |    |   |   |   |
|--------|----|----|---|---|---|
| female | 14 | 24 | 2 | 4 | 0 |
| female | 14 | 18 | 0 | 5 | 7 |
| female | 14 | 22 | 5 | 5 | 6 |
| female | 16 | 25 | 3 | 1 | 5 |
| female | 16 | 23 | 5 | 5 | 7 |
| female | 16 | 29 | 5 | 4 | 2 |
| male   | 17 | 19 | 3 | 1 | 3 |
| male   | 17 | 21 | 3 | 1 | 0 |
| male   | 17 | 26 | 7 | 4 | 0 |
| male   | 17 | 15 | 7 | 4 | 0 |
| female | 17 | 20 | 2 | 2 | 3 |
| female | 17 | 24 | 2 | 2 | 7 |
| female | 17 | 18 | 1 | 2 | 7 |
| male   | 14 | 17 | 2 | 2 | 1 |
| male   | 14 | 27 | 2 | 0 | 2 |

|        |    |    |   |   |   |
|--------|----|----|---|---|---|
| male   | 14 | 16 | 4 | 3 | 3 |
| female | 14 | 20 | 3 | 2 | 7 |
| female | 14 | 20 | 4 | 3 | 7 |
| female | 14 | 17 | 3 | 3 | 7 |
| male   | 14 | 21 | 3 | 1 | 7 |
| female | 14 | 22 | 3 | 2 | 7 |
| female | 16 | 23 | 2 | 7 | 3 |
| male   | 16 | 23 | 7 | 7 | 7 |
| female | 16 | 19 | 2 | 3 | 1 |
| male   | 16 | 23 | 7 | 7 | 7 |
| female | 16 | 18 | 2 | 2 | 7 |
| female | 16 | 20 | 2 | 7 | 0 |
| male   | 16 | 22 | 1 | 0 | 0 |
| male   | 16 | 22 | 4 | 4 | 3 |
| male   | 16 | 25 | 4 | 5 | 0 |

|        |    |    |   |   |   |
|--------|----|----|---|---|---|
| male   | 16 | 29 | 7 | 7 | 0 |
| male   | 16 | 16 | 7 | 7 | 0 |
| female | 16 | 37 | 3 | 3 | 3 |
| female | 16 | 24 | 3 | 3 | 3 |
| female | 16 | 21 | 2 | 1 | 4 |
| female | 16 | 21 | 2 | 1 | 4 |
| female | 17 | 23 | 0 | 0 | 2 |
| female | 17 | 24 | 2 | 4 | 7 |
| female | 17 | 22 | 3 | 2 | 1 |
| female | 17 | 38 | 7 | 3 | 7 |
| male   | 17 | 26 | 5 | 2 | 2 |
| female | 17 | 23 | 7 | 4 | 7 |
| male   | 17 | 28 | 3 | 2 | 7 |
| male   | 17 | 18 | 1 | 0 | 4 |
| male   | 14 | 19 | 1 | 0 | 4 |

|        |    |    |   |   |   |
|--------|----|----|---|---|---|
| male   | 14 | 30 | 5 | 3 | 1 |
| male   | 14 | 24 | 5 | 0 | 7 |
| female | 14 | 23 | 3 | 1 | 0 |
| female | 14 | 24 | 6 | 6 | 7 |
| male   | 14 | 25 | 7 | 6 | 2 |
| male   | 14 | 30 | 2 | 0 | 5 |
| male   | 14 | 22 | 2 | 1 | 4 |
| female | 14 | 20 | 1 | 0 | 7 |
| female | 14 | 38 | 3 | 2 | 5 |
| female | 14 | 24 | 1 | 0 | 7 |
| female | 14 | 25 | 2 | 1 | 7 |
| male   | 15 | 17 | 3 | 2 | 4 |
| female | 15 | 24 | 3 | 2 | 0 |
| male   | 15 | 23 | 2 | 0 | 2 |
| male   | 15 | 25 | 4 | 4 | 2 |



|        |    |    |   |   |   |
|--------|----|----|---|---|---|
| male   | 16 | 24 | 3 | 1 | 6 |
| female | 16 | 23 | 1 | 0 | 3 |
| female | 16 | 20 | 3 | 3 | 7 |
| female | 16 | 22 | 3 | 7 | 5 |
| female | 16 | 17 | 5 | 2 | 0 |
| female | 16 | 21 | 5 | 2 | 0 |
| male   | 16 | 30 | 7 | 7 | 3 |
| male   | 16 | 21 | 7 | 3 | 2 |
| male   | 16 | 24 | 2 | 1 | 6 |
| male   | 16 | 20 | 2 | 2 | 4 |
| male   | 16 | 23 | 1 | 0 | 4 |
| male   | 17 | 30 | 7 | 5 | 7 |
| female | 17 | 20 | 1 | 1 | 5 |
| female | 17 | 21 | 1 | 2 | 2 |
| male   | 17 | 30 | 2 | 0 | 7 |

|        |    |    |   |   |   |
|--------|----|----|---|---|---|
| male   | 17 | 21 | 3 | 2 | 5 |
| female | 17 | 31 | 6 | 1 | 2 |
| female | 17 | 16 | 7 | 1 | 0 |
| female | 17 | 15 | 7 | 1 | 2 |
| male   | 17 | 20 | 5 | 0 | 1 |
| male   | 14 | 14 | 7 | 2 | 2 |
| female | 14 | 23 | 2 | 1 | 4 |
| female | 14 | 20 | 2 | 1 | 4 |
| male   | 15 | 20 | 4 | 4 | 0 |
| male   | 15 | 17 | 4 | 4 | 0 |
| female | 16 | 19 | 3 | 5 | 7 |
| female | 16 | 24 | 4 | 4 | 7 |
| male   | 16 | 17 | 3 | 4 | 2 |
| female | 16 | 17 | 3 | 5 | 7 |
| male   | 16 | 17 | 3 | 3 | 2 |

|        |    |    |   |   |   |
|--------|----|----|---|---|---|
| male   | 16 | 20 | 5 | 5 | 1 |
| female | 16 | 22 | 7 | 0 | 0 |
| female | 16 | 14 | 0 | 2 | 3 |
| male   | 17 | 23 | 1 | 1 | 0 |
| male   | 17 | 24 | 4 | 3 | 2 |
| male   | 17 | 19 | 5 | 6 | 0 |
| male   | 17 | 24 | 7 | 0 | 0 |
| male   | 17 | 24 | 4 | 3 | 0 |
| male   | 17 | 23 | 7 | 7 | 0 |
| male   | 17 | 27 | 3 | 4 | 0 |
| female | 17 | 21 | 5 | 2 | 3 |
| female | 17 | 25 | 0 | 0 | 7 |
| female | 17 | 25 | 5 | 0 | 7 |
| female | 14 | 25 | 3 | 1 | 1 |
| female | 14 | 15 | 1 | 1 | 3 |

|        |    |    |   |   |   |
|--------|----|----|---|---|---|
| female | 14 | 24 | 3 | 1 | 0 |
| female | 14 | 35 | 2 | 0 | 0 |
| male   | 14 | 19 | 4 | 2 | 4 |
| male   | 14 | 24 | 2 | 1 | 1 |
| male   | 14 | 26 | 4 | 3 | 6 |
| male   | 14 | 23 | 4 | 2 | 6 |
| male   | 14 | 19 | 7 | 7 | 7 |
| male   | 14 | 19 | 1 | 1 | 2 |
| female | 14 | 24 | 2 | 1 | 0 |
| female | 15 | 31 | 3 | 0 | 7 |
| male   | 15 | 20 | 4 | 3 | 2 |
| female | 15 | 20 | 4 | 2 | 0 |
| male   | 15 | 16 | 5 | 0 | 3 |
| male   | 15 | 24 | 4 | 3 | 0 |
| male   | 15 | 27 | 5 | 7 | 0 |

|        |    |    |   |   |   |
|--------|----|----|---|---|---|
| female | 15 | 22 | 3 | 0 | 0 |
| male   | 15 | 22 | 5 | 6 | 5 |
| female | 15 | 20 | 0 | 0 | 0 |
| female | 15 | 16 | 2 | 0 | 0 |
| female | 15 | 21 | 5 | 7 | 0 |
| male   | 15 | 16 | 7 | 4 | 1 |
| male   | 16 | 32 | 5 | 2 | 0 |
| male   | 16 | 38 | 5 | 1 | 0 |
| female | 16 | 28 | 1 | 0 | 0 |
| female | 16 | 22 | 3 | 2 | 3 |
| female | 16 | 21 | 1 | 0 | 1 |
| male   | 16 | 22 | 5 | 3 | 2 |
| female | 16 | 28 | 1 | 0 | 0 |
| male   | 16 | 22 | 4 | 1 | 0 |
| male   | 16 | 25 | 5 | 1 | 0 |

|        |    |    |   |   |   |
|--------|----|----|---|---|---|
| female | 16 | 34 | 1 | 0 | 0 |
| male   | 16 | 26 | 4 | 1 | 0 |
| female | 16 | 29 | 2 | 0 | 0 |
| male   | 17 | 24 | 1 | 0 | 0 |
| male   | 17 | 25 | 7 | 5 | 4 |
| male   | 17 | 20 | 1 | 1 | 0 |
| male   | 17 | 30 | 7 | 0 | 4 |
| female | 17 | 22 | 0 | 1 | 1 |
| male   | 17 | 21 | 2 | 1 | 4 |
| male   | 18 | 22 | 3 | 1 | 4 |
| female | 18 | 18 | 3 | 0 | 7 |
| female | 14 | 30 | 3 | 4 | 7 |
| male   | 14 | 11 | 1 | 0 | 2 |
| female | 14 | 28 | 1 | 0 | 1 |
| female | 14 | 20 | 3 | 6 | 4 |

|        |    |    |   |   |   |
|--------|----|----|---|---|---|
| female | 14 | 29 | 3 | 5 | 4 |
| male   | 14 | 20 | 1 | 0 | 2 |
| female | 14 | 20 | 3 | 5 | 4 |
| male   | 14 | 20 | 0 | 1 | 1 |
| female | 14 | 22 | 1 | 2 | 7 |
| female | 14 | 20 | 1 | 0 | 2 |
| male   | 14 | 15 | 2 | 1 | 7 |
| male   | 14 | 14 | 5 | 1 | 7 |
| male   | 14 | 18 | 5 | 7 | 0 |
| male   | 14 | 39 | 7 | 3 | 7 |
| female | 15 | 20 | 1 | 0 | 7 |
| female | 15 | 20 | 2 | 7 | 7 |
| male   | 15 | 20 | 6 | 6 | 3 |
| male   | 15 | 37 | 7 | 7 | 3 |
| male   | 15 | 16 | 3 | 3 | 7 |

|        |    |    |   |   |   |
|--------|----|----|---|---|---|
| male   | 15 | 22 | 1 | 1 | 5 |
| male   | 15 | 18 | 1 | 1 | 7 |
| female | 16 | 25 | 1 | 0 | 2 |
| female | 16 | 27 | 1 | 1 | 2 |
| female | 16 | 30 | 5 | 2 | 1 |
| female | 16 | 22 | 4 | 1 | 2 |
| female | 16 | 31 | 4 | 0 | 1 |
| female | 16 | 34 | 7 | 1 | 1 |
| female | 16 | 24 | 4 | 1 | 2 |
| male   | 16 | 24 | 4 | 4 | 2 |
| male   | 16 | 28 | 3 | 1 | 4 |
| male   | 16 | 38 | 3 | 0 | 0 |
| male   | 16 | 32 | 1 | 2 | 3 |
| female | 17 | 29 | 1 | 0 | 0 |
| female | 17 | 23 | 0 | 0 | 2 |



|        |    |    |   |   |   |
|--------|----|----|---|---|---|
| female | 17 | 22 | 0 | 0 | 2 |
| male   | 17 | 15 | 4 | 3 | 7 |
| male   | 17 | 25 | 7 | 7 | 2 |
| male   | 17 | 27 | 4 | 3 | 7 |
| male   | 14 | 26 | 3 | 5 | 1 |
| female | 14 | 32 | 5 | 3 | 1 |
| female | 14 | 25 | 2 | 0 | 2 |
| female | 14 | 23 | 3 | 2 | 0 |
| female | 14 | 30 | 3 | 2 | 4 |
| male   | 14 | 20 | 3 | 1 | 7 |
| male   | 14 | 36 | 7 | 5 | 7 |
| male   | 14 | 46 | 2 | 1 | 7 |
| male   | 14 | 38 | 3 | 2 | 7 |
| male   | 14 | 31 | 6 | 5 | 3 |
| male   | 15 | 31 | 5 | 2 | 7 |

|        |    |    |   |   |   |
|--------|----|----|---|---|---|
| male   | 15 | 22 | 6 | 1 | 7 |
| male   | 15 | 13 | 7 | 7 | 2 |
| male   | 15 | 29 | 7 | 7 | 7 |
| female | 15 | 29 | 7 | 6 | 4 |
| female | 15 | 21 | 3 | 0 | 2 |
| male   | 15 | 36 | 7 | 4 | 2 |
| female | 15 | 22 | 3 | 0 | 4 |
| female | 15 | 23 | 2 | 2 | 1 |
| female | 15 | 28 | 3 | 1 | 0 |
| male   | 15 | 39 | 7 | 7 | 0 |
| male   | 16 | 24 | 7 | 2 | 0 |
| male   | 16 | 28 | 7 | 5 | 3 |
| male   | 16 | 41 | 6 | 5 | 3 |
| male   | 16 | 32 | 1 | 0 | 0 |
| male   | 16 | 17 | 2 | 0 | 0 |

|        |    |    |   |   |   |
|--------|----|----|---|---|---|
| male   | 16 | 31 | 7 | 5 | 2 |
| male   | 16 | 21 | 3 | 1 | 1 |
| male   | 16 | 16 | 1 | 1 | 0 |
| male   | 16 | 22 | 0 | 0 | 0 |
| male   | 16 | 22 | 2 | 2 | 0 |
| female | 16 | 34 | 1 | 4 | 7 |
| female | 16 | 21 | 1 | 5 | 7 |
| female | 16 | 18 | 2 | 1 | 4 |
| female | 16 | 20 | 4 | 6 | 3 |
| female | 16 | 21 | 5 | 5 | 2 |
| female | 16 | 24 | 1 | 0 | 4 |
| female | 16 | 13 | 0 | 0 | 6 |
| female | 17 | 21 | 1 | 0 | 0 |
| male   | 17 | 24 | 2 | 2 | 0 |
| male   | 17 | 27 | 0 | 0 | 2 |

|        |    |    |   |   |   |
|--------|----|----|---|---|---|
| female | 17 | 16 | 0 | 2 | 0 |
| male   | 17 | 23 | 7 | 2 | 4 |
| male   | 17 | 32 | 5 | 2 | 7 |
| male   | 17 | 33 | 2 | 0 | 2 |
| female | 17 | 33 | 1 | 0 | 0 |
| female | 17 | 25 | 2 | 1 | 0 |
| male   | 17 | 13 | 2 | 1 | 7 |
| male   | 17 | 26 | 0 | 1 | 4 |
| female | 17 | 32 | 1 | 5 | 7 |
| female | 17 | 33 | 1 | 5 | 7 |
| female | 17 | 19 | 1 | 5 | 2 |
| female | 17 | 25 | 2 | 3 | 7 |
| female | 17 | 20 | 7 | 5 | 2 |
| female | 17 | 23 | 3 | 3 | 2 |
| female | 17 | 28 | 2 | 2 | 0 |

|        |    |    |   |   |   |
|--------|----|----|---|---|---|
| female | 14 | 23 | 5 | 1 | 0 |
| male   | 14 | 15 | 4 | 5 | 3 |
| male   | 14 | 19 | 5 | 5 | 3 |
| male   | 14 | 20 | 3 | 2 | 2 |
| female | 14 | 29 | 0 | 0 | 0 |
| female | 14 | 19 | 7 | 7 | 7 |
| female | 14 | 32 | 7 | 7 | 2 |
| female | 14 | 17 | 2 | 1 | 0 |
| male   | 14 | 22 | 7 | 4 | 3 |
| male   | 14 | 23 | 3 | 2 | 7 |
| male   | 15 | 29 | 2 | 0 | 0 |
| male   | 15 | 17 | 2 | 0 | 0 |
| male   | 15 | 39 | 2 | 0 | 0 |
| male   | 15 | 20 | 2 | 0 | 0 |
| male   | 15 | 16 | 2 | 0 | 0 |

|        |    |    |   |   |   |
|--------|----|----|---|---|---|
| male   | 15 | 19 | 1 | 0 | 0 |
| male   | 15 | 19 | 1 | 0 | 0 |
| female | 15 | 31 | 5 | 1 | 0 |
| female | 15 | 26 | 5 | 2 | 7 |
| male   | 15 | 25 | 7 | 7 | 3 |
| male   | 15 | 24 | 2 | 2 | 0 |
| male   | 15 | 26 | 7 | 3 | 2 |
| male   | 15 | 28 | 7 | 2 | 0 |
| male   | 15 | 17 | 3 | 4 | 6 |
| male   | 15 | 30 | 4 | 2 | 3 |
| male   | 15 | 19 | 5 | 5 | 0 |
| female | 15 | 25 | 3 | 2 | 7 |
| female | 15 | 27 | 1 | 0 | 2 |
| female | 15 | 23 | 1 | 0 | 4 |
| female | 15 | 24 | 1 | 4 | 5 |

|        |    |    |   |   |   |
|--------|----|----|---|---|---|
| female | 15 | 23 | 5 | 1 | 1 |
| female | 16 | 31 | 5 | 1 | 4 |
| female | 16 | 30 | 4 | 2 | 3 |
| female | 16 | 17 | 2 | 2 | 7 |
| female | 16 | 34 | 5 | 1 | 3 |
| female | 16 | 24 | 6 | 2 | 2 |
| male   | 16 | 15 | 4 | 3 | 7 |
| male   | 16 | 27 | 7 | 7 | 7 |
| male   | 16 | 18 | 2 | 1 | 5 |
| male   | 16 | 25 | 7 | 7 | 4 |
| male   | 16 | 20 | 5 | 5 | 7 |
| male   | 16 | 17 | 2 | 0 | 7 |
| male   | 16 | 44 | 1 | 0 | 7 |
| male   | 16 | 32 | 1 | 0 | 3 |
| male   | 17 | 28 | 5 | 3 | 2 |

|        |    |    |   |   |   |
|--------|----|----|---|---|---|
| female | 17 | 25 | 4 | 2 | 0 |
| female | 17 | 23 | 1 | 1 | 7 |
| female | 17 | 20 | 7 | 1 | 7 |
| female | 17 | 16 | 1 | 1 | 7 |
| female | 17 | 19 | 1 | 0 | 6 |
| female | 17 | 21 | 3 | 1 | 7 |
| female | 17 | 15 | 3 | 0 | 1 |
| female | 17 | 23 | 2 | 0 | 0 |
| female | 17 | 22 | 1 | 0 | 0 |
| male   | 17 | 20 | 7 | 7 | 7 |
| male   | 17 | 24 | 7 | 7 | 0 |
| male   | 17 | 26 | 7 | 4 | 1 |
| female | 17 | 21 | 2 | 1 | 7 |
| female | 17 | 24 | 3 | 0 | 0 |
| male   | 14 | 31 | 1 | 1 | 0 |



|        |    |    |   |   |   |
|--------|----|----|---|---|---|
| male   | 14 | 26 | 3 | 0 | 2 |
| male   | 14 | 23 | 1 | 0 | 0 |
| female | 14 | 30 | 7 | 7 | 5 |
| female | 14 | 26 | 4 | 2 | 2 |
| female | 14 | 27 | 5 | 2 | 2 |
| female | 14 | 21 | 3 | 3 | 2 |
| female | 14 | 37 | 4 | 4 | 2 |
| female | 14 | 23 | 3 | 2 | 5 |
| male   | 15 | 22 | 6 | 4 | 6 |
| female | 15 | 25 | 2 | 1 | 2 |
| female | 15 | 27 | 2 | 5 | 0 |
| female | 15 | 30 | 4 | 1 | 2 |
| female | 15 | 29 | 4 | 5 | 0 |
| male   | 15 | 18 | 5 | 2 | 3 |
| female | 15 | 29 | 5 | 2 | 5 |

|        |    |    |   |   |   |
|--------|----|----|---|---|---|
| female | 15 | 23 | 3 | 2 | 6 |
| male   | 15 | 37 | 7 | 7 | 0 |
| male   | 15 | 29 | 6 | 6 | 5 |
| male   | 15 | 24 | 5 | 2 | 2 |
| male   | 15 | 34 | 1 | 0 | 3 |
| female | 15 | 23 | 2 | 2 | 6 |
| female | 15 | 23 | 7 | 7 | 7 |
| female | 16 | 43 | 4 | 4 | 0 |
| female | 16 | 38 | 5 | 5 | 0 |
| male   | 16 | 35 | 3 | 2 | 5 |
| male   | 16 | 29 | 6 | 5 | 7 |
| female | 16 | 22 | 2 | 0 | 7 |
| female | 16 | 24 | 0 | 0 | 1 |
| female | 16 | 29 | 0 | 0 | 7 |
| female | 16 | 20 | 4 | 0 | 3 |

|        |    |    |   |   |   |
|--------|----|----|---|---|---|
| female | 16 | 23 | 5 | 1 | 0 |
| male   | 17 | 19 | 3 | 1 | 0 |
| male   | 17 | 26 | 4 | 1 | 0 |
| male   | 17 | 44 | 6 | 2 | 0 |
| female | 17 | 63 | 1 | 0 | 0 |
| female | 17 | 29 | 3 | 2 | 3 |
| female | 17 | 27 | 2 | 0 | 7 |
| male   | 17 | 28 | 7 | 6 | 0 |
| male   | 14 | 27 | 4 | 0 | 7 |
| male   | 14 | 21 | 2 | 1 | 3 |
| female | 14 | 19 | 4 | 1 | 7 |
| female | 14 | 32 | 6 | 2 | 6 |
| female | 14 | 17 | 3 | 0 | 7 |
| female | 14 | 42 | 4 | 1 | 7 |
| female | 14 | 37 | 1 | 0 | 0 |

|        |    |    |   |   |   |
|--------|----|----|---|---|---|
| female | 14 | 23 | 3 | 1 | 4 |
| male   | 15 | 42 | 2 | 2 | 7 |
| male   | 15 | 25 | 0 | 0 | 3 |
| male   | 15 | 18 | 2 | 0 | 4 |
| male   | 15 | 29 | 3 | 3 | 4 |
| male   | 15 | 26 | 4 | 4 | 3 |
| male   | 15 | 27 | 5 | 1 | 7 |
| female | 15 | 37 | 3 | 0 | 2 |
| female | 15 | 22 | 7 | 0 | 0 |
| female | 15 | 23 | 2 | 0 | 3 |
| female | 15 | 21 | 2 | 3 | 2 |
| male   | 15 | 36 | 7 | 0 | 7 |
| female | 16 | 29 | 1 | 5 | 7 |
| female | 16 | 35 | 1 | 6 | 2 |
| female | 16 | 34 | 2 | 0 | 5 |

|        |    |    |   |   |   |
|--------|----|----|---|---|---|
| female | 16 | 29 | 1 | 0 | 6 |
| male   | 16 | 35 | 1 | 1 | 4 |
| male   | 16 | 16 | 3 | 2 | 2 |
| male   | 16 | 31 | 4 | 1 | 3 |
| male   | 16 | 38 | 2 | 5 | 0 |
| male   | 16 | 37 | 1 | 0 | 5 |
| male   | 16 | 49 | 5 | 3 | 7 |
| female | 16 | 21 | 7 | 5 | 7 |
| female | 17 | 27 | 7 | 1 | 0 |
| female | 17 | 21 | 4 | 1 | 0 |
| male   | 17 | 27 | 7 | 7 | 0 |
| female | 17 | 28 | 3 | 1 | 0 |
| male   | 17 | 50 | 5 | 2 | 4 |
| female | 17 | 35 | 7 | 7 | 7 |
| female | 17 | 46 | 3 | 4 | 2 |

|        |    |    |   |   |   |
|--------|----|----|---|---|---|
| female | 17 | 38 | 1 | 5 | 4 |
| female | 14 | 21 | 2 | 1 | 0 |
| female | 14 | 26 | 3 | 2 | 0 |
| female | 14 | 25 | 1 | 0 | 0 |
| male   | 14 | 28 | 2 | 0 | 0 |
| male   | 14 | 27 | 2 | 1 | 0 |
| male   | 14 | 26 | 2 | 1 | 0 |
| female | 15 | 22 | 2 | 3 | 0 |
| male   | 15 | 26 | 3 | 1 | 0 |
| female | 15 | 26 | 2 | 1 | 0 |
| male   | 15 | 29 | 3 | 3 | 1 |
| male   | 15 | 26 | 2 | 1 | 0 |
| female | 15 | 24 | 2 | 2 | 0 |
| male   | 15 | 25 | 3 | 2 | 0 |
| male   | 15 | 34 | 2 | 0 | 0 |

|        |    |    |   |   |   |
|--------|----|----|---|---|---|
| male   | 15 | 34 | 3 | 1 | 3 |
| male   | 15 | 42 | 7 | 7 | 0 |
| female | 15 | 24 | 3 | 0 | 7 |
| male   | 16 | 46 | 7 | 7 | 7 |
| male   | 16 | 48 | 4 | 3 | 3 |
| male   | 16 | 49 | 5 | 5 | 7 |
| male   | 16 | 69 | 4 | 2 | 3 |
| male   | 16 | 29 | 5 | 3 | 3 |
| male   | 16 | 25 | 4 | 3 | 3 |
| male   | 16 | 28 | 2 | 5 | 3 |
| male   | 16 | 23 | 5 | 3 | 0 |
| male   | 16 | 27 | 5 | 0 | 2 |
| female | 17 | 19 | 0 | 2 | 6 |
| male   | 17 | 34 | 5 | 7 | 0 |
| female | 17 | 28 | 1 | 1 | 0 |

|        |    |    |   |   |   |
|--------|----|----|---|---|---|
| female | 17 | 24 | 0 | 0 | 0 |
| female | 17 | 21 | 0 | 0 | 0 |
| female | 17 | 32 | 3 | 3 | 0 |
| male   | 17 | 25 | 3 | 7 | 4 |
| male   | 17 | 31 | 5 | 5 | 3 |
| male   | 17 | 32 | 7 | 3 | 2 |
| male   | 17 | 27 | 2 | 2 | 0 |
| male   | 17 | 27 | 3 | 2 | 3 |
| female | 14 | 27 | 7 | 2 | 5 |
| female | 14 | 19 | 7 | 3 | 4 |
| male   | 14 | 23 | 7 | 5 | 2 |
| male   | 14 | 23 | 7 | 6 | 3 |
| male   | 14 | 25 | 7 | 5 | 4 |
| female | 14 | 39 | 4 | 0 | 0 |
| female | 14 | 27 | 7 | 2 | 0 |



|        |    |    |   |   |   |
|--------|----|----|---|---|---|
| female | 15 | 24 | 5 | 3 | 7 |
| male   | 15 | 23 | 1 | 1 | 1 |
| female | 15 | 33 | 3 | 1 | 2 |
| female | 16 | 19 | 2 | 2 | 2 |
| female | 16 | 21 | 3 | 2 | 4 |
| male   | 16 | 19 | 3 | 4 | 2 |
| male   | 16 | 18 | 4 | 4 | 7 |
| female | 16 | 40 | 4 | 1 | 7 |
| male   | 17 | 33 | 6 | 5 | 5 |
| female | 17 | 40 | 5 | 3 | 2 |
| female | 17 | 24 | 3 | 2 | 7 |
| female | 17 | 22 | 3 | 3 | 7 |
